# Supplementary material
Source: PubMed Central journal article supplement (PMC10066369)
Supplement: 41422_2023_788_MOESM2_ESM.pdf [file 41422_2023_788_MOESM2_ESM.pdf]

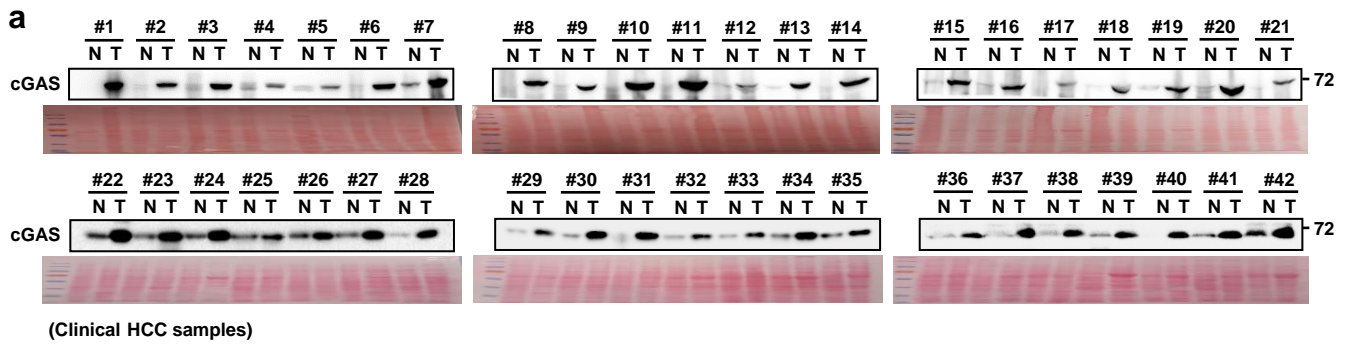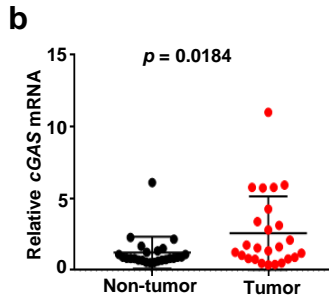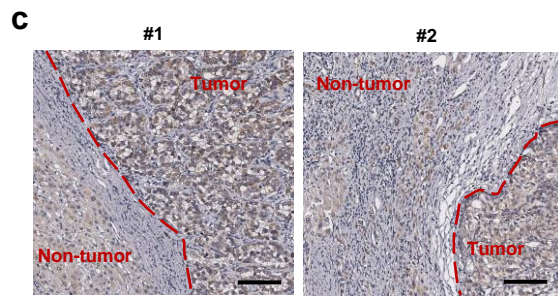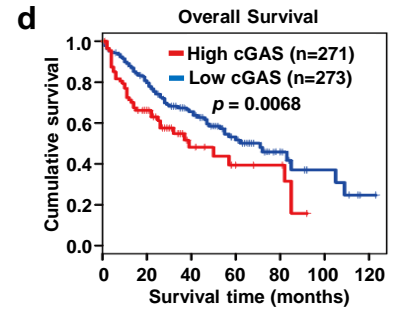

**Supplementary information, Fig S2 The expression of cGAS is significantly increased in tumor tissues**

**a**, Western blotting analysis of the protein levels of cGAS in paired adjacent noncancerous liver tissues and human HCC tissues. Ponceau staining is shown at the bottom as the loading control. **b**, qRT-PCR analysis of *cGAS* mRNA levels in paired adjacent noncancerous liver tissues and human HCC tissues. **c**, Representative IHC images of cGAS staining were shown from the HCC specimen that included cancerous tissues and adjacent tissues. Scale bars, 100  $\mu\text{m}$ . **d**, Kaplan-Meier curves from univariate analysis for patients with low versus high cGAS expression ( $n = 271$  in high cGAS group and  $n = 273$  in low cGAS group;  $p = 0.0068$  by log-rank test. For **(b)**, the data are presented as the mean  $\pm$  s.e.m.  $p$  value was calculated by two-tailed unpaired Student's t-test. \*,  $p \leq 0.05$ .
