# Supplementary material
Source: PubMed Central journal article supplement (PMC10066369)
Supplement: 41422_2023_788_MOESM3_ESM.pdf [file 41422_2023_788_MOESM3_ESM.pdf]

**a**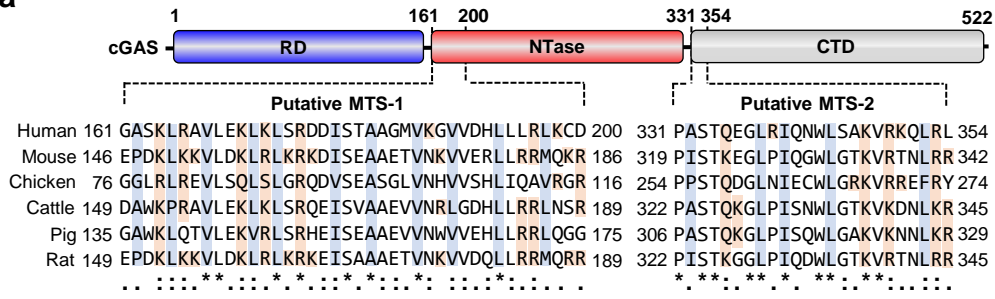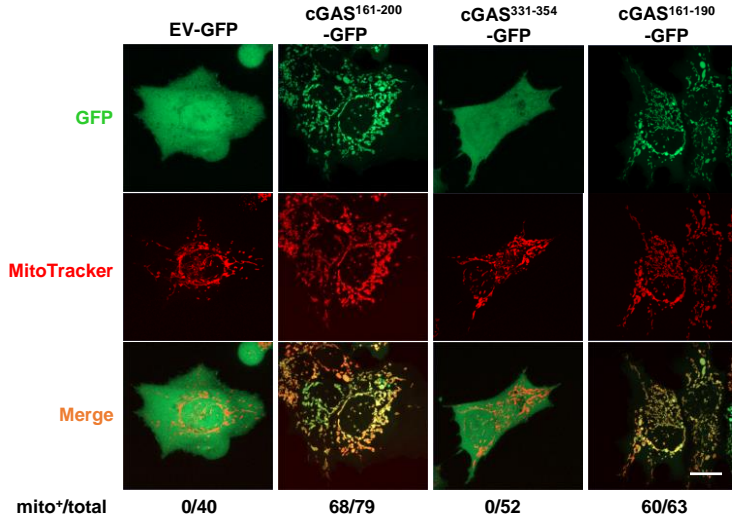**b**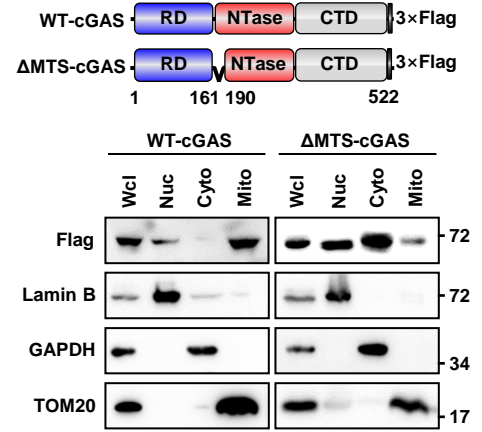**d**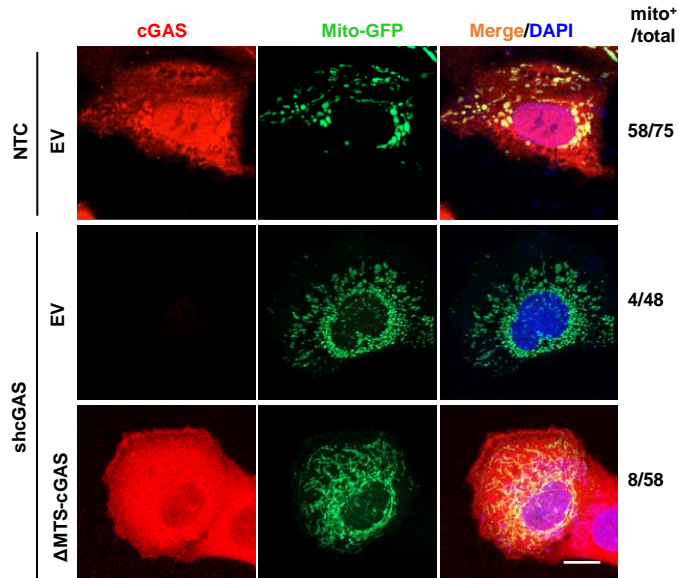**c**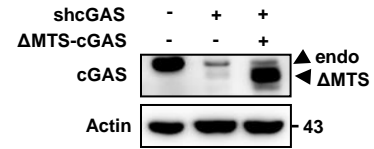**e**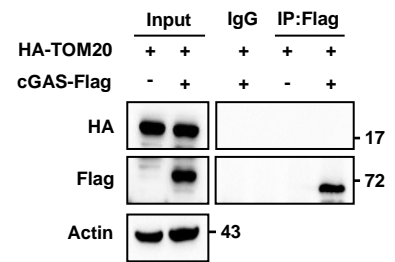

**Supplementary information, Fig S3 cGAS is actively imported in mitochondria through mitochondrial targeting sequence**

**a**, Alignment of the Mitochondrial Targeting Sequence (MTS) of cGAS from different species. Positively charged residues are highlighted in orange and hydrophobic residues are marked in blue. Representative fluorescence images show the localization of Human cGAS peptides, 161-200, 331-354 or 161-190 stably expressed in Hep3B cells. The mitochondria were marked by MitoTracker in the cells. Scale bars, 20  $\mu\text{m}$ . Values shown on the bottom are the numbers of cells displaying mitochondrial cGAS relative to the total numbers of cells examined. **b**, Western blotting analysis of the protein levels of cGAS in subcellular fractions including nucleus, cytosol and mitochondria in Hep3B cells overexpressing wild type cGAS (cGAS<sup>WT</sup>) or cGAS mutant depleting the potential MTS (cGAS <sup>$\Delta$ MTS</sup>). Fractionation fidelity was verified by detection of Lamin B in the nuclear fraction, GAPDH in the cytosolic fraction and TOM20 in the mitochondrial fraction. Diagrammatic representation of wild type cGAS (cGAS<sup>WT</sup>) or cGAS mutant depleting the potential MTS (cGAS <sup>$\Delta$ MTS</sup>). **c**, Western blotting analysis of the protein levels of cGAS in Hep3B cells with endogenous cGAS knockdown and  $\Delta$ MTS-cGAS overexpression.  $\beta$ -Actin served as the loading control. **d**, Representative immunofluorescence images staining for cGAS in Hep3B cells with endogenous cGAS knockdown and  $\Delta$ MTS-cGAS overexpression. The mitochondria were marked by Mito-GFP expression in the cells. The nucleus was stained with DAPI. Scale bars, 20  $\mu\text{m}$ . Values shown in the right are the numbers of cells displaying mitochondrial cGAS relative to the total numbers of cells examined. **e**, Co-IP assay of the protein interaction between cGAS and TOM20 in Hep3B cells. Hep3B cells were infected with lentivirus containing Flag-EV or cGAS-Flag and HA-TOM20 plasmids. Cell lysates were immunoprecipitated with an anti-Flag antibody, followed by Western blotting analysis with antibodies against Flag and HA tags.
