# Supplementary material
Source: PubMed Central journal article supplement (PMC10066369)
Supplement: 41422_2023_788_MOESM5_ESM.pdf [file 41422_2023_788_MOESM5_ESM.pdf]

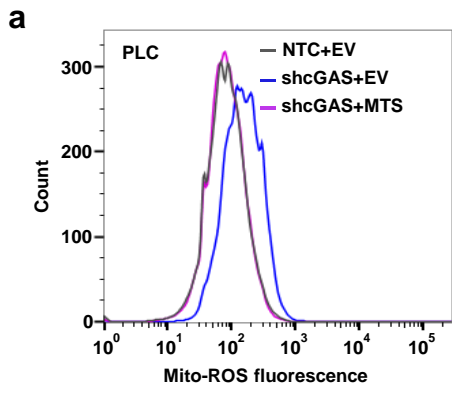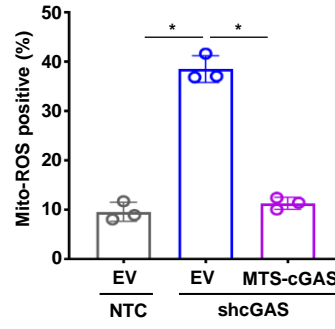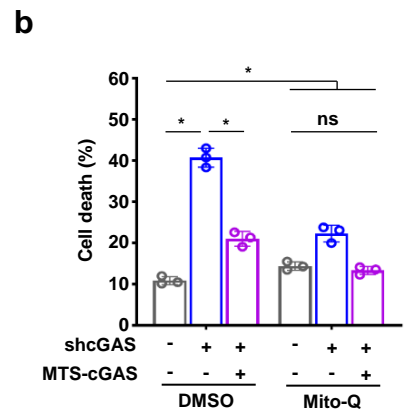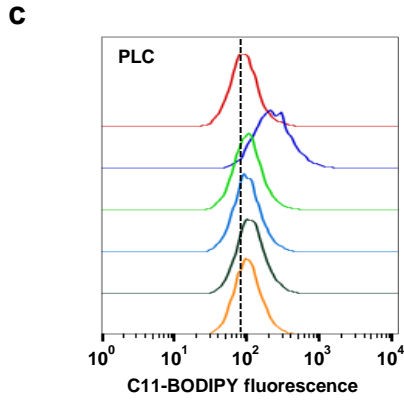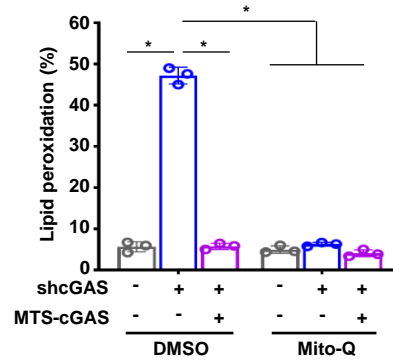

**Supplementary information, Fig S5 Mitochondrial cGAS suppresses ferroptosis by inhibiting the accumulation of excessive mitochondrial ROS**

**a**, Measurement of mitochondrial ROS levels in PLC cells with endogenous cGAS knockdown and exogenous MTS-cGAS overexpression. Representative histogram data and statistical results are shown. **b**, Cell death analysis of Hep3B cells with indicated genotypes treated with or without Mito-Q. **c**, Lipid peroxidation analysis of PLC cells with endogenous cGAS knockdown and exogenous MTS-cGAS overexpression treated with Mito-Q. Representative histogram data and statistical results are shown. For **(a)** to **(c)**, the data are presented as the mean  $\pm$  SD of three independent experiments. *p* value was calculated by two-tailed unpaired Student's *t-test* (**a-c**). \*,  $p \leq 0.05$ ; ns, not significant.
