# Supplementary material
Source: PubMed Central journal article supplement (PMC10066369)
Supplement: 41422_2023_788_MOESM7_ESM.pdf [file 41422_2023_788_MOESM7_ESM.pdf]

**Supplementary information, Fig S7 Mitochondrial cGAS promotes tumor progression by suppressing ferroptosis**

**a**, Tumor weight measurement of Hep3B xenografts with endogenous cGAS knockdown and overexpressing wild type cGAS(WT-cGAS) or cGAS mutant depleting the potential MTS ( $\Delta$ MTS-cGAS). Image of tumors was showed in the left. **b**, Tumor weight measurement of Hep3B xenografts with indicated genotypes treated with or without Lip-1. Image of tumors was showed in the left. **c**, Ki67 staining in the xenograft tumors with indicated genotypes treated with or without Lip-1 was quantitated using H-score in IHC assays. **d**, Tumor weight measurement of Hep3B xenografts with indicated genotypes treated with or without Mdivi-1. Image of tumors was showed in the left. **e**, Western blotting analysis of the protein levels of cGAS in the xenograft tumors with indicated genotypes treated with or without Mdivi-1. Calnexin served as the loading control. For (**a**) to (**d**), the data are presented as the mean  $\pm$  SEM. *p* value was calculated by two-tailed unpaired Student's t-test. \*,  $p \leq 0.05$ ; ns, not significant.
