# Supplementary material
Source: PubMed Central journal article supplement (PMC10066369)
Supplement: 41422_2023_788_MOESM8_ESM.pdf [file 41422_2023_788_MOESM8_ESM.pdf]

### Supplementary information, Table S1

Mass spectrometric analyses of immunoprecipitates of 3×Flag-tagged cGAS in mitochondria in Hep3B cells.

| Proteins | Score | Peptides | Coverage (%) |
|----------|-------|----------|--------------|
| HADHA    | 78.13 | 25       | 40.5         |
| ALDH18A1 | 65.26 | 25       | 38.84        |
| SLC25A13 | 44.5  | 20       | 38.67        |
| ACADVL   | 31.03 | 13       | 23.21        |
| IMMT     | 31.02 | 12       | 23.56        |
| SDHA     | 30.6  | 14       | 33.44        |
| PNPT1    | 29.22 | 18       | 27.84        |
| ACSL4    | 24.31 | 13       | 22.99        |
| ACSL3    | 22.33 | 12       | 20.83        |
| AIFM1    | 21.45 | 13       | 28.9         |
| NDUFS1   | 16.28 | 9        | 18.81        |
| TOM70    | 15.88 | 5        | 11.51        |
| SLC25A12 | 15.82 | 7        | 11.95        |
| OPA1     | 15.62 | 8        | 9.74         |
| DRP1     | 13.5  | 7        | 14.93        |
| DARS2    | 12.98 | 8        | 14.88        |
| PCK2     | 11.01 | 8        | 15.63        |
| GFM1     | 10.95 | 6        | 11.34        |
| LETM1    | 10.68 | 6        | 10.15        |
| LRPPRC   | 7.19  | 8        | 7.53         |

The proteins were ranked by scores.
