# Supplementary material
Source: PubMed Central journal article supplement (PMC10066369)
Supplement: 41422_2023_788_MOESM9_ESM.pdf [file 41422_2023_788_MOESM9_ESM.pdf]

## Supplementary information, Table S2

### Reagents.

| Reagents                   | Source                    | Identifier                         |
|----------------------------|---------------------------|------------------------------------|
| <b>Chemicals</b>           |                           |                                    |
| Liproxstatin-1             | Selleck                   | S7699                              |
| Ferroxstatin-1             | Sigma-Aldrich             | SML0583                            |
| 3-Methyladenine            | Sigma-Aldrich             | M9281                              |
| Z-VAD-FMK                  | Sigma-Aldrich             | V116                               |
| Necrostatin-1              | Sigma-Aldrich             | N9037                              |
| Mitoquinone mesylate       | MedChemExpress            | HY-100116A                         |
| Mdivi-1                    | Sigma-Aldrich             | M0199                              |
| MitoSOX                    | Invitrogen                | M36008                             |
| BODIPY 581/591 C11         | Invitrogen                | D3861                              |
| Propidium iodine           | Sigma-Aldrich             | P4170                              |
| PF-06928215                | MedChemExpress            | HY-114182                          |
| <b>Antibodies</b>          |                           |                                    |
| cGAS                       | Abcam                     | Cat# ab224144, RRID: AB_2904576    |
| cGAS                       | Cell Signaling Technology | Cat# 79978; RRID: AB_2905508       |
| TBK1                       | Cell Signaling Technology | Cat# 3504; RRID: AB_2255663        |
| p-TBK1                     | Cell Signaling Technology | Cat# 5483; RRID: AB_10693472       |
| IRF3                       | Cell Signaling Technology | Cat# 4302; RRID: AB_1904036        |
| p-IRF3                     | Cell Signaling Technology | Cat# 4947; RRID: AB_823547         |
| Ki67                       | Abcam                     | Cat# ab16667; RRID: AB_302459      |
| GPX4                       | Abcam                     | Cat# ab125066; RRID: AB_10973901   |
| DRP1                       | Proteintech               | Cat# 12957-1-AP; RRID: 2093525     |
| MFN1                       | Proteintech               | Cat# 13798-1-AP; RRID: AB_2266318  |
| TOM20                      | Proteintech               | Cat# 11802-1-AP; RRID: AB_2207530  |
| TFAM                       | Proteintech               | Cat# 22586-1-AP; RRID: AB_11182588 |
| TOM70                      | Proteintech               | Cat# 14528-1-AP; RRID: AB_2303727  |
| COX4                       | Proteintech               | Cat# 11242-1-AP; RRID: AB_2085278  |
| DHODH                      | Proteintech               | Cat# 14877-1-AP; RRID: AB_2091723  |
| SLC7A11                    | Proteintech               | Cat# 26864-1-AP; RRID: AB_2880661  |
| FSP1                       | Proteintech               | Cat# 20886-1-AP; RRID: AB_2878756  |
| OPA1                       | Proteintech               | Cat# 27733-1-AP; RRID: AB_2810292  |
| ACSL4                      | Proteintech               | Cat# 22401-1-AP; RRID: AB_2832995  |
| Calnexin                   | Proteintech               | Cat# 10427-2-AP; RRID: AB_2069033  |
| $\beta$ -Actin             | Proteintech               | Cat# 60008-1-Ig; RRID: AB_2289225  |
| GAPDH                      | Proteintech               | Cat# 10494-1-AP; RRID: AB_2263076  |
| $\alpha$ - Tubulin         | Proteintech               | Cat# 66031-1-Ig; RRID: AB_11042766 |
| HRP-conjugated anti-rabbit | Bio-Rad / AbD Serotec     | Cat# 170-6515; RRID: AB_11125142   |
| HRP-conjugated anti-mouse  | Bio-Rad / AbD Serotec     | Cat# 170-6516; RRID: AB_11125547   |

|                                                                                                 |            |                          |                                  |
|-------------------------------------------------------------------------------------------------|------------|--------------------------|----------------------------------|
| CoraLite488-conjugated<br>Mouse IgG(H+L)                                                        | Goat Anti- | Proteintech              | Cat# SA00013-1; RRID: AB_2810983 |
| CoraLite594-conjugated<br>Rabbit IgG(H+L)                                                       | Goat Anti- | Proteintech              | Cat# SA00013-4, RRID: AB_2810984 |
| Goat anti-Rabbit IgG (H+L) Highly<br>Cross-Adsorbed Secondary Antibody,<br>Alexa Fluor Plus 647 |            | Thermo Fisher Scientific | Cat# A32733 RRID: AB_2633282     |

---
