# Supplementary material
Source: PubMed Central journal article supplement (PMC10066369)
Supplement: 41422_2023_788_MOESM10_ESM.pdf [file 41422_2023_788_MOESM10_ESM.pdf]

### Supplementary information, Table S3

Targeting Sequence of shRNAs.

| Name      | Sequence of forward primer                                      | Sequence of reverse primer                                     |
|-----------|-----------------------------------------------------------------|----------------------------------------------------------------|
| shcGAS-1  | CCGGGCCAGTAGTGCTTGGTTTCCACTCGAGTGAAAA<br>CCAAGCACTACTGGCTTTTTG  | AATTCAAAAAGCCAGTAGTGCTTGGTTTCCACTCGAG<br>TGAAACCAAGCACTACTGGC  |
| shcGAS-2  | CCGGGCTTATCATGCAGGCAAATACTCGAGATTTG<br>CCTGCATGATAAAGCTTTTTG    | AATTCAAAAAGCTTATCATGCAGGCAAATACTCGAG<br>TATTGCCTGCATGATAAAGC   |
| shTOM70-1 | CCGGGCATGCTGTTAGCCGATAAAGCTCGAGCTTAT<br>CGGCTAACAGCATGCTTTTTG   | AATTCAAAAAGCATGCTGTTAGCCGATAAAGCTCGAG<br>CTTTATCGGCTAACAGCATGC |
| shTOM70-2 | CCGGCCAGATAATGCTACAACATATCTCGAGATATGT<br>TGTAGCATTATCTGGTTTTTTG | AATTCAAAAACCAGATAATGCTACAACATATCTCGAG<br>ATATGTTGTAGCATTATCTGG |
| shDRP1    | CCGGGCAGAACACATCACACATTTACTCGAGTAAATG<br>TGTGATGTGTTCTGCTTTTTG  | AATTCAAAAAGCAGAACACATCACACATTTACTCGAG<br>TAAATGTGTGATGTGTTCTGC |
