# Supplementary material
Source: PubMed Central journal article supplement (PMC10066369)
Supplement: 41422_2023_788_MOESM11_ESM.pdf [file 41422_2023_788_MOESM11_ESM.pdf]

### Supplementary information, Table S4

Oligonucleotide primers used for qRT-PCR.

| Name  | Sequence of forward primer | Sequence of reverse primer |
|-------|----------------------------|----------------------------|
| cGAS  | TAACCCTGGCTTTGGAATCAAAA    | TGGGTACAAGGTAAAATGGCTTT    |
| IFNB1 | ATGACCAACAAGTGTCTCCTCC     | GGAATCCAAGCAAGTTGTAGCTC    |
| ISG15 | TTTGCCAGTACAGGAGCTTGTG     | GGGTGATCTGCGCCTTCA         |
| IFIT1 | TTGATGACGATGAAATGCCTGA     | AGGTCACCAGACTCCTCAC        |
| 18S   | CGGCGACGACCCATTCGAAC       | GAATCGAACCCCTGATTCCCCGTC   |
